# Supplementary material
Source: HighWire-hosted journal article supplement (http://www.cmajopen.ca/highwire/filestream/90670/field_highwire_adjunct_files/2/open-2022-0210-3-at.pdf)
Supplement: open-2022-0210-3-at.pdf [file open-2022-0210-3-at.pdf]

**Appendix Table 3. Codes used to identify homelessness**

| Database | Variable Name                                                                            | Variable Value                                                                   |
|----------|------------------------------------------------------------------------------------------|----------------------------------------------------------------------------------|
| DAD/SDS  | INSTTYPE (Institution type)                                                              | SH (Supportive Housing)                                                          |
|          | DX10CODE1 to DX10CODE25, CMGDIAG (Diagnosis variables)                                   | Z590 (Homelessness), Z591 (Inadequate housing)                                   |
|          | PSTLCODE (Postal Code)                                                                   | XX (Transient/Homeless) or any uniquely identifying postal codes                 |
| OMHRS    | PREDX10CODE to PREDX10CODE11, POSTDX10CODE1 to POSTDX10CODE24 (Diagnosis variables)      | Z590 (Homelessness), Z591 (Inadequate housing)                                   |
|          | PRIOR_RESIDENCE (Prior residential status)<br>USUAL_RESIDENCE (Usual residential status) | 6 (Homeless (with or without shelter))<br>8 (Homeless (with or without shelter)) |
|          | ADMITFROM (Admitted From)                                                                | 8 (Homeless (with or without shelter))                                           |
|          | DISCHLIVING (Living arrangement at discharge)                                            | 8 (Homeless (with or without shelter))                                           |
| NACRS    | DX10CODE1 to DX10CODE25 (Diagnosis variables)                                            | Z590 (Homelessness), Z591 (Inadequate housing)                                   |
|          | RESTTYPE (Residence type)                                                                | 3 (Homeless), 4 (Shelter)                                                        |
|          | PSTLCODE (Postal Code)                                                                   | XX (Transient/Homeless) or any uniquely identifying postal code                  |
| RPDB     | PSTLCODE                                                                                 | Any uniquely identifying postal code                                             |

© 2023 Institute for Clinical Evaluative Sciences. All rights reserved.
